# Supplementary material for: Emerging Mutations Potentially Related to SARS-CoV-2 Immune Escape: The Case of a Long-Term Patient
Source: MDPI journal article supplement (doi:10.3390/life11111259), 2021-11-18
Supplement: s1 [file s1]

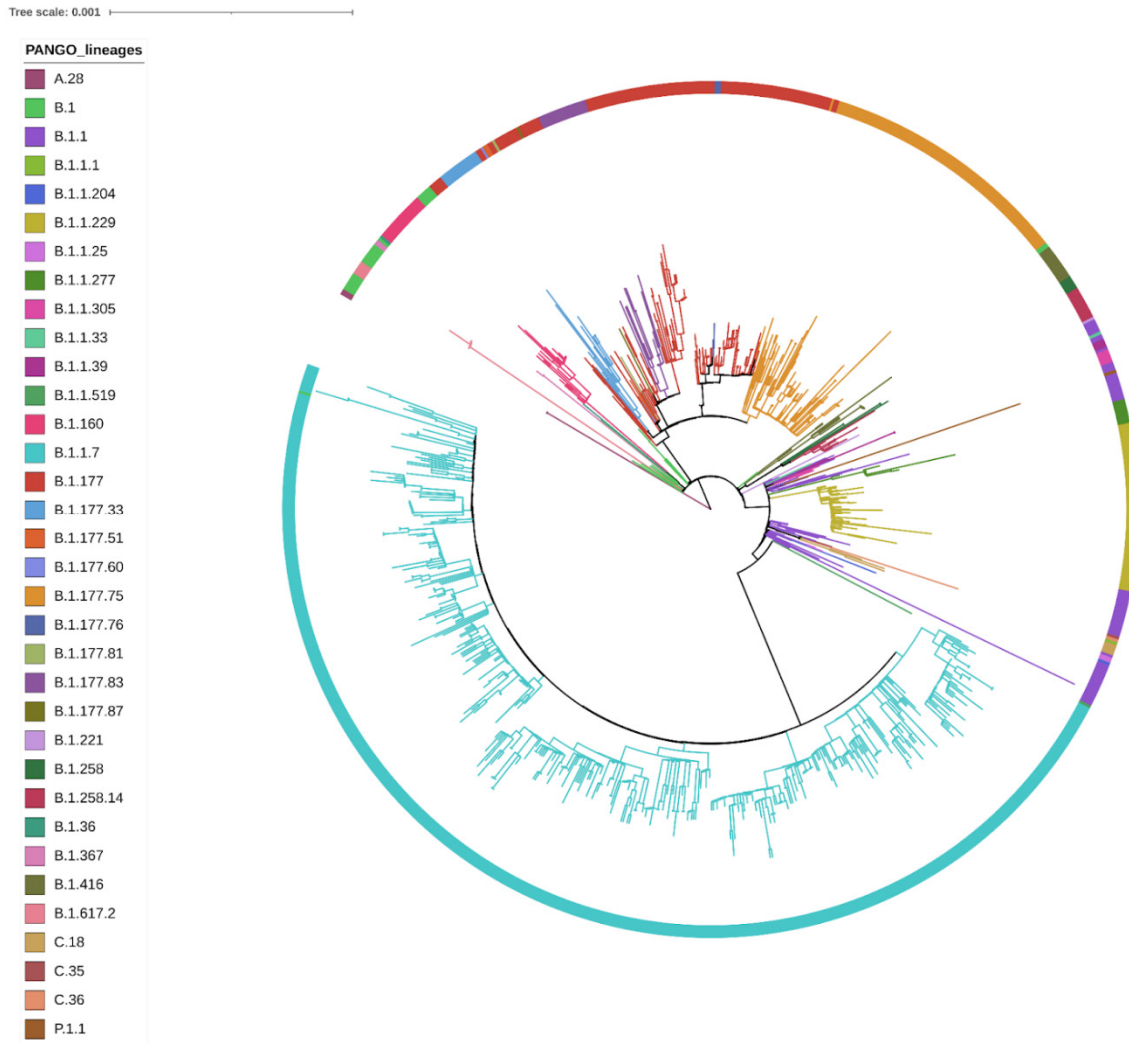

**Supplementary Figure S1.** Phylogenetic tree of all Apulian SARS-CoV-2 genomes available through GISAID as per May 18th, 2021. The tree was computed with IQ-TREE 2 as detailed in the Methods section. Genome B.1.177.51:TS is marked with a star.

| Genome position | Nucleotide change | Gene  | Aminoacid change | Lineage defining |
|-----------------|-------------------|-------|------------------|------------------|
| 241             | C241T             |       | -                |                  |
| 445             | T445C             | ORF1a | -                |                  |
| 1314            | C1314T            | ORF1a | T350I            | private mutation |
| 1385            | C1385T            | ORF1a | H374Y            | B.1.177.51       |
| 3037            | C3037T            | ORF1a | -                |                  |
| 6286            | C6286T            | ORF1a | -                |                  |

|       |                   |       |            |                  |
|-------|-------------------|-------|------------|------------------|
| 10658 | G10658A           | ORF1a | V3465I     | private mutation |
| 14408 | C14408T           | ORF1b | P314L      | B.1.177.51       |
| 21255 | G21255C           | ORF1b | -          |                  |
| 21989 | G21989-<br>TTTATT | S     | V143D      | private mutation |
| 21989 | G21989-<br>TTTATT | S     | del144/145 | private mutation |
| 22227 | C22227T           | S     | A222V      | B.1.177.51       |
| 23212 | G23212A           | S     | E484K      | private mutation |
| 24303 | A24303G           | S     | D614G      | B.1.177.51       |
| 25681 | G25681A           | ORF3a | V97I       | private mutation |
| 26527 | C26527T           | N     | A220V      | B.1.177.51       |
| 26801 | C26801G           | M     | -          |                  |
| 27944 | C27944T           | ORF8  | -          |                  |
| 28932 | C28932T           | M     | A2V        | private mutation |
| 29645 | G29645T           | ORF10 | V30L       | B.1.177.51       |

**Supplementary Table S1.** The complete list of the aminoacid changes in the B.1.177.51:TS genome.

| ID  | B.1     | B.1.177.51:TS | P.1   |
|-----|---------|---------------|-------|
| HW1 | 1:320   | 1:80          | 1:160 |
| HW2 | 1:480   | 1:80          | 1:80  |
| HW3 | 1:320   | 1:80          | 1:160 |
| HW4 | 1:640   | 1:80          | 1:160 |
| HW5 | 1: 1280 | 1:240         | 1:320 |
| HW6 | 1:320   | 1:120         | 1:160 |
| HW7 | 1:1280  | 1:240         | 1:320 |
| HW8 | 1:240   | 1:120         | 1:80  |
| HW9 | 1:160   | 1:60          | 1:80  |

|      |         |       |       |
|------|---------|-------|-------|
| HW10 | 1:960   | 1:240 | 1:320 |
| HW11 | 1:320   | 1:60  | 1:160 |
| HW12 | 1: 1280 | 1:240 | 1:320 |
| HW13 | 1:1280  | 1:320 | 1:640 |
| HW14 | 1:240   | 1:40  | 1:80  |
| HW15 | 1:240   | 1:80  | 1:160 |
| HW16 | 1:160   | 1:40  | 1:40  |
| HW17 | 1:480   | 1:80  | 1:80  |
| HW18 | 1:240   | 1:60  | 1:60  |

**Supplementary Table S2.** The table shows the neutralising antibody titre values for the 18 sera (HW1 to HW18) obtained from vaccinated healthcare workers, tested against strains B.1, B.1.177, B.1.177.51 with E484K mutation, P.1, respectively.

| ID  | B.1   | B.1.177.51:TS |
|-----|-------|---------------|
| P1  | 1:160 | 1:120         |
| P2  | 1:160 | 1:80          |
| P3  | 1:160 | 1:80          |
| P4  | 1:320 | 1:120         |
| P5  | 1:320 | 1:120         |
| P6  | 1:320 | 1:120         |
| P7  | 1:320 | 1:160         |
| P8  | 1:320 | 1:480         |
| P9  | 1:80  | 1:80          |
| P10 | 1:320 | 1:480         |
| P11 | 1:160 | 1:160         |
| P12 | 1:320 | 1:240         |
| P13 | 1:640 | 1:400         |
| P14 | 1:640 | 1:640         |
| P15 | 1:160 | 1:160         |
| P16 | 1:640 | 1:640         |

**Supplementary Table S3.** The table shows the neutralising antibody titre values for the 16 hyperimmune sera (P1 to P16) obtained from patients, tested against strains B.1, B.1.177.51 with E484K mutation, respectively.
